# Supplementary material for: Validation of MSIntuit as an AI-based pre-screening tool for MSI detection from colorectal cancer histology slides
Source: PubMed Central journal article supplement (PMC10628260; doi:10.1038/s41467-023-42453-6), 2023-11-06
Supplement: 41467_2023_42453_MOESM1_ESM.pdf [file 41467_2023_42453_MOESM1_ESM.pdf]

# Supplementary Information

## Supplementary methods

**Slide selection.** Guidelines regarding slide selection defined to guide pathologists for the use of MSIntuit in clinical practice were to follow the maximum number of the following criteria: the slide with the largest surface of tumour tissue, the slide with the most invasive tumour, the slide with the least necrosis, the slide must not contain preparation artefacts (staining artefacts, folds on the fabric cut, residual air or water bubbles, traces of marker, damaged coverslips, scanning artefacts).

**Bland-Altman plot to assess inter-scanner reliability.** The Bland-Altman plot was also used (Supplementary figure 3) to assess the agreement between DP200 and UFS prediction scores, and the 95% limits of agreement (LoA) were calculated as  $\text{mean} \pm 1.96$  standard deviation (SD) of the difference (DP200 Score - UFS score) (Supplementary table 12). A p-value < 0.05 was considered statistically significant.

**ICC and Cohen's Kappa to assess inter-scanner reliability.** The intraclass Correlation Coefficients (ICC) was also used to measure the agreement of the continuous predictions of the same slides digitised with UFS and DP200 scanners. Specifically, we used a single-measurement (i.e. same patient), absolute agreement, two-way mixed effects (fixed raters i.e. scanners across all targets i.e. patients) model which corresponds to the ICC(A, 2) form.<sup>1</sup> The ICC value indicates how much of the score variance can be explained by random effects (subjects) and not fixed effects (scanners). An ICC below 0.5 indicates poor reliability, an ICC between 0.5 and 0.75 indicates moderate reliability, an ICC between 0.75 and 0.9 indicates good reliability, and an ICC above 0.9 indicates excellent reliability.<sup>2</sup> A Cohen's kappa under 0.2 indicates slight agreement, 0.21 to 0.40 indicates fair agreement, 0.41–0.60 indicates moderate agreement, 0.61–0.80 indicates substantial agreement, and 0.81 to 1.0 indicates almost perfect agreement.<sup>3</sup>

**Slide registration.** WSIs of the samples obtained with the DP200 and UFS scanners were not perfectly aligned because of each scanner's principles of operations (orientation of the objective, automatic cropping of empty regions, etc). To compare tile individual scores across the two scanners (figure 2E), we therefore used an image registration process to make sure the local regions of one slide match the local regions of its counterpart digitised with the other scanner. This registration process was done using the Elastix and Transformix softwares.<sup>4,5</sup> Non-rigid registration parameters were first computed on sub-sampled WSIs (8 $\mu$ m per pixel), optimising the Mattes Advanced Mutual Information on ten consecutive levels of resolution. Those parameters were finally applied to the high resolution UFS WSI in order to obtain aligned WSIs at identical resolutions.

**Interpretability analysis.** For each tile, four pathologists were asked to annotate the presence of the following histology criteria: normal, fibrosis, inflammation, muscle/vessels, tumour, necrosis, mucin. Majority voting was used to settle disagreements between pathologists and annotations of a 5th pathologist (D.E.) were used for cases where two pathologists disagreed with the two others.

**Software and libraries used.** The experiments were carried out with python (version 3.8) and made use of the following packages: torch (version 1.11), torchvision (0.12.0), numpy (version

48 1.19.5), scikit-learn (version 0.24.1), pandas (version 1.4.3), openslide-python (1.1.2), matplotlib  
49 (version 3.5.1), scipy (version 1.7.3).  
50  
51

52 **Supplementary figures**

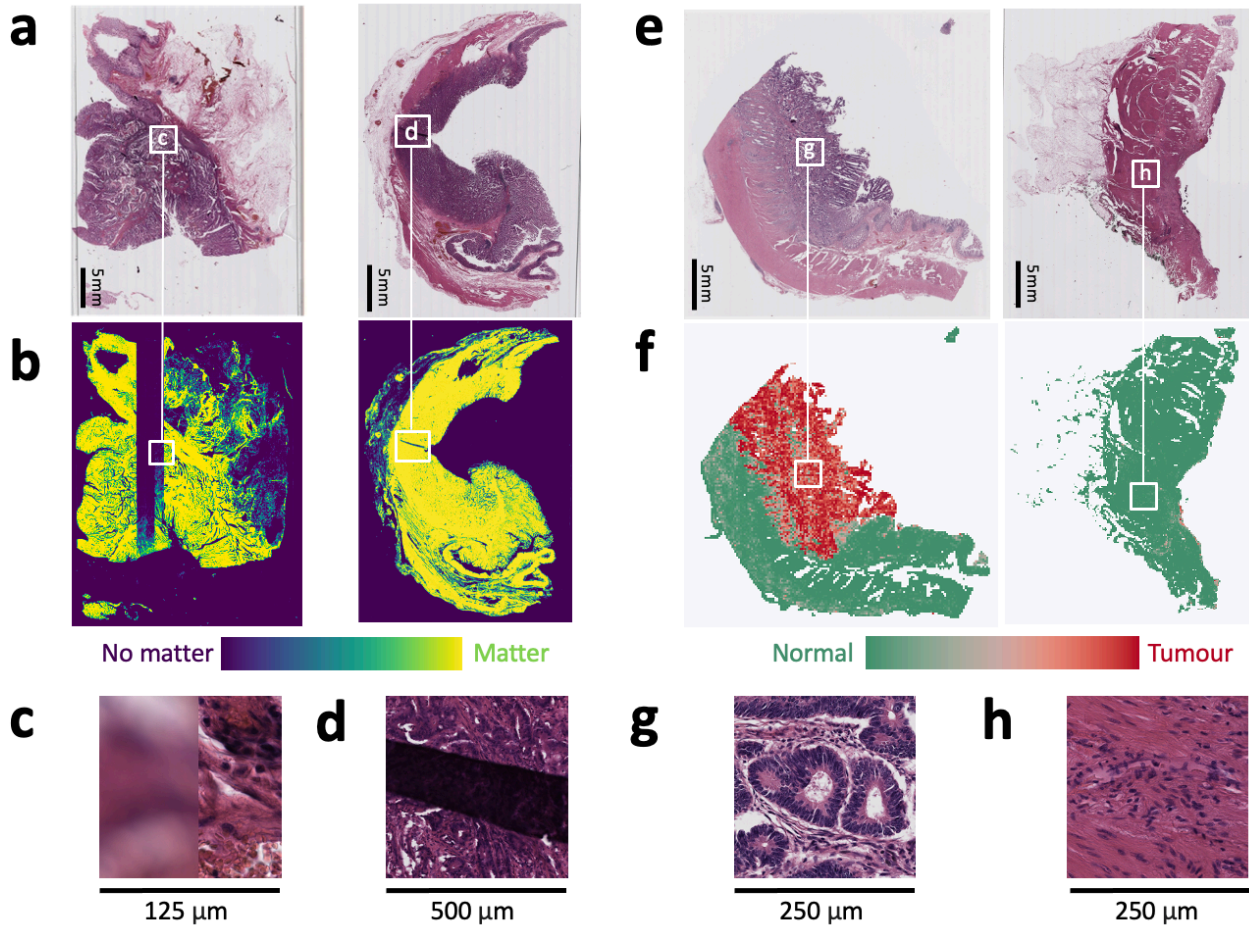

53  
54 **Supplementary figure 1. Quality Check.**  
55 a) Left: slide with a blurry strip due to a digitisation issue, not noticeable at low resolution, right :  
56 slide with a tissue fold. b) Matter detection heatmaps of the UNet neural network integrated in  
57 MSIntuit's preprocessing and QC procedures. Blurry regions (left) and tissue fold (right) are not  
58 detected as matter. c), d) Zoomed-in images of blurry and tissue fold regions. e) Slide with  
59 abundant tumour tissue that passed QC (left), slide with too few tumour tissue (<500 tumour tiles)  
60 that did not pass QC. f) Corresponding tumour heatmaps obtained with a tumour classifier part of  
61 MSIntuit's QC procedure. g), h), Zoomed-in images of tumour (left) and (normal) regions of left  
62 and right slide, respectively.  
63

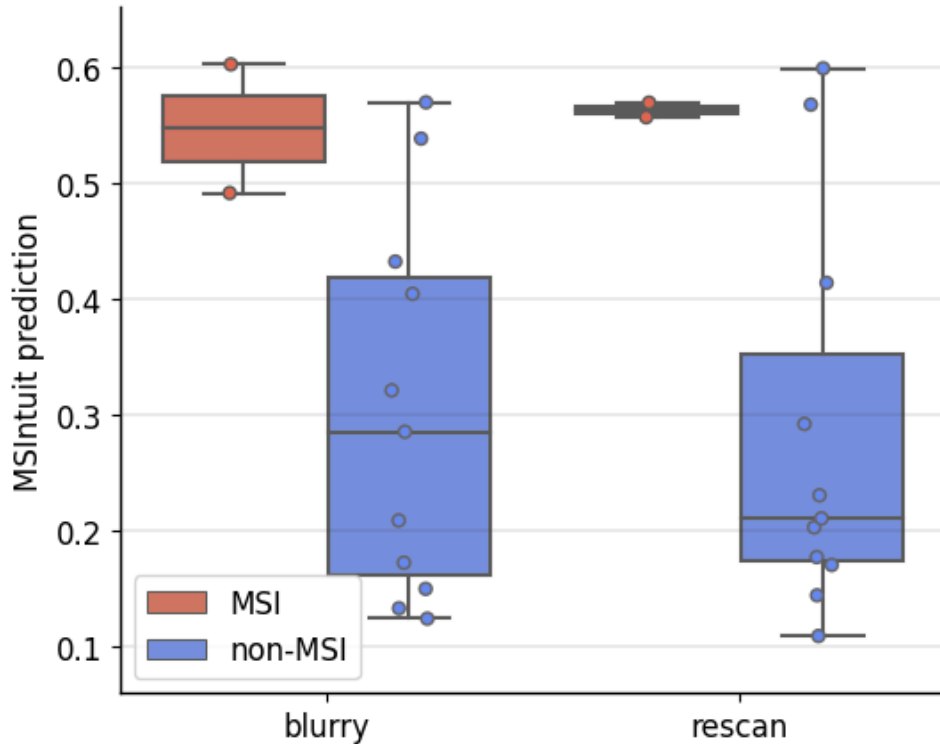

64

65 Supplementary figure 2. MSIntuit predictions on slides with large blurry areas and their  
 66 rescanned counterparts.

67 We looked at the model predictions of the slides that displayed large blurry areas, which were  
 68 detected during the QC step (n=13 samples). We compared them against the predictions of  
 69 slides that were rescanned. Median prediction for blurry (respectively rescanned) slides was of  
 70 0.29 (respectively 0.21) for MSS cases and 0.55 (respectively 0.56) for MSI cases. Source data  
 71 are provided as a Source Data file.

72

73

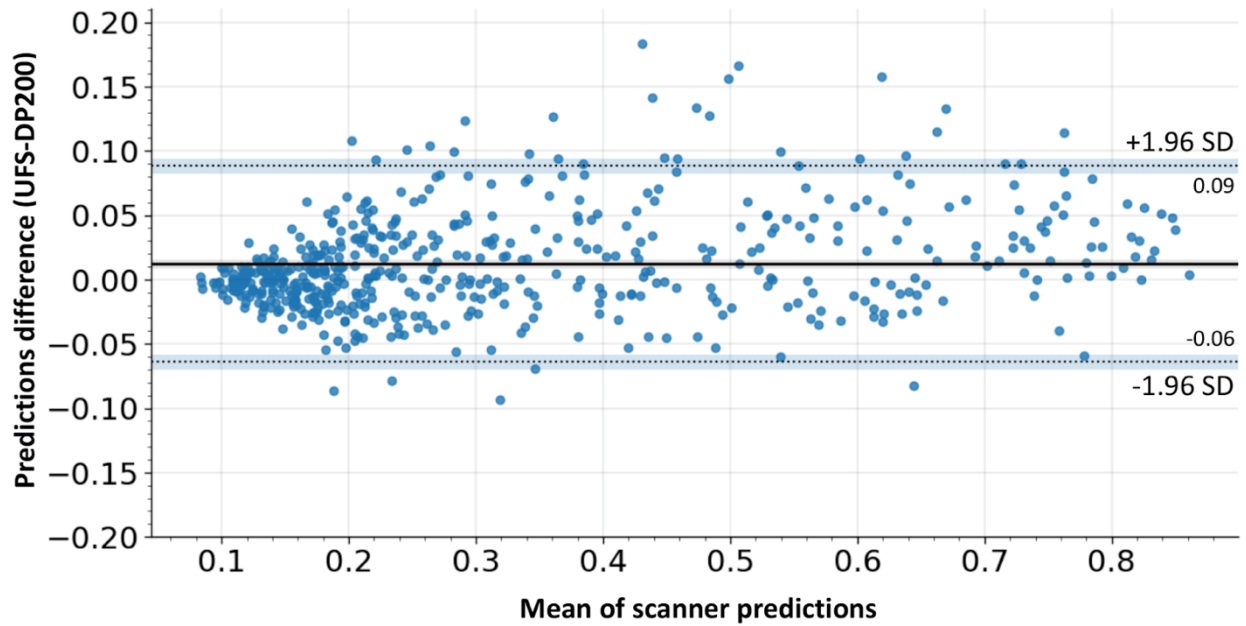

74

75 Supplementary figure 3. Bland-Altman plot for inter-scanner reliability.

76 A Bland-Altman plot to analyse the agreement of MSIntuit predictions on UFS and DP200  
 77 scanners by looking at the mean inter-scanner difference of prediction scores (n = 540 samples).  
 78 A relatively low prediction score variability was observed with an overall mean inter-scanner score  
 79 difference of 0.01 (where the MSIntuit score can vary between 0 and 1) with a limit of agreement  
 80 95% confidence interval ranging from -0.06 to 0.09. Source data are provided as a Source Data  
 81 file.

82

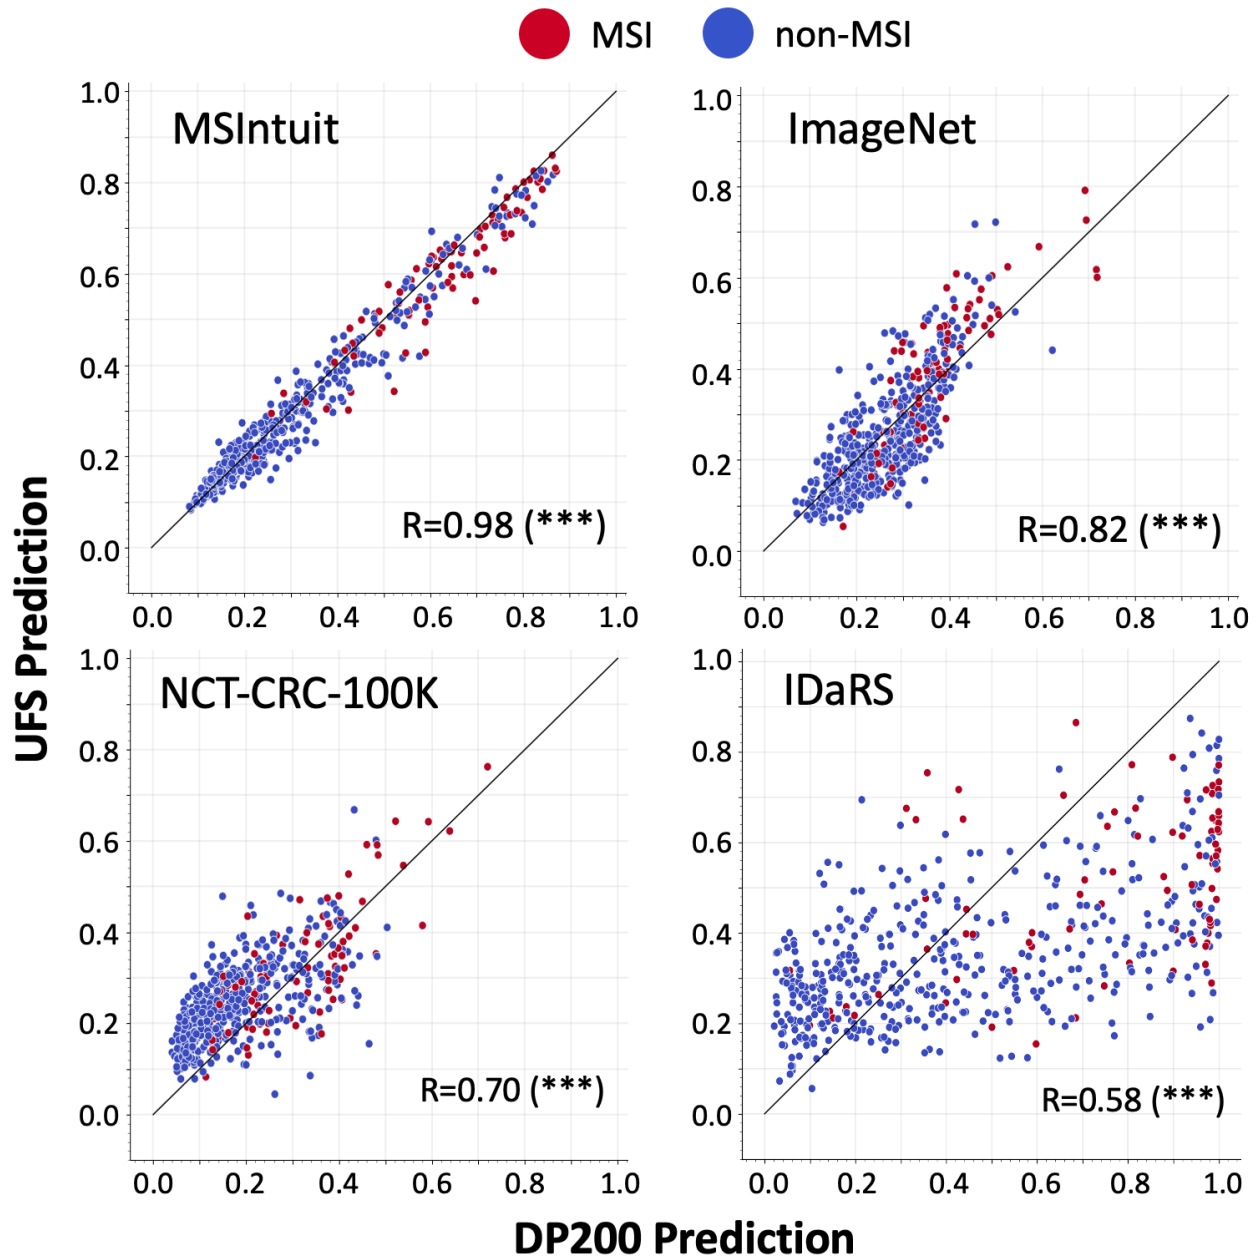

83

84 Supplementary figure 4. Robustness to scanner comparison of MSIntuit and other  
 85 machine learning methods.

86 Correlation of the predictions on the same n=540 slides digitised on the UFS/DP200 scanners  
 87 resulted in a Pearson's correlation of 0.98 (two-sided t-test  $p < 0.001$ ), 0.82 ( $p < 0.001$ ), 0.70  
 88 ( $p < 0.001$ ) and 0.58 ( $p < 0.001$ ) for MSIntuit, ImageNet, NCT-CRC-100K and iDaRS methods,  
 89 respectively. Source data are provided as a Source Data file.

90

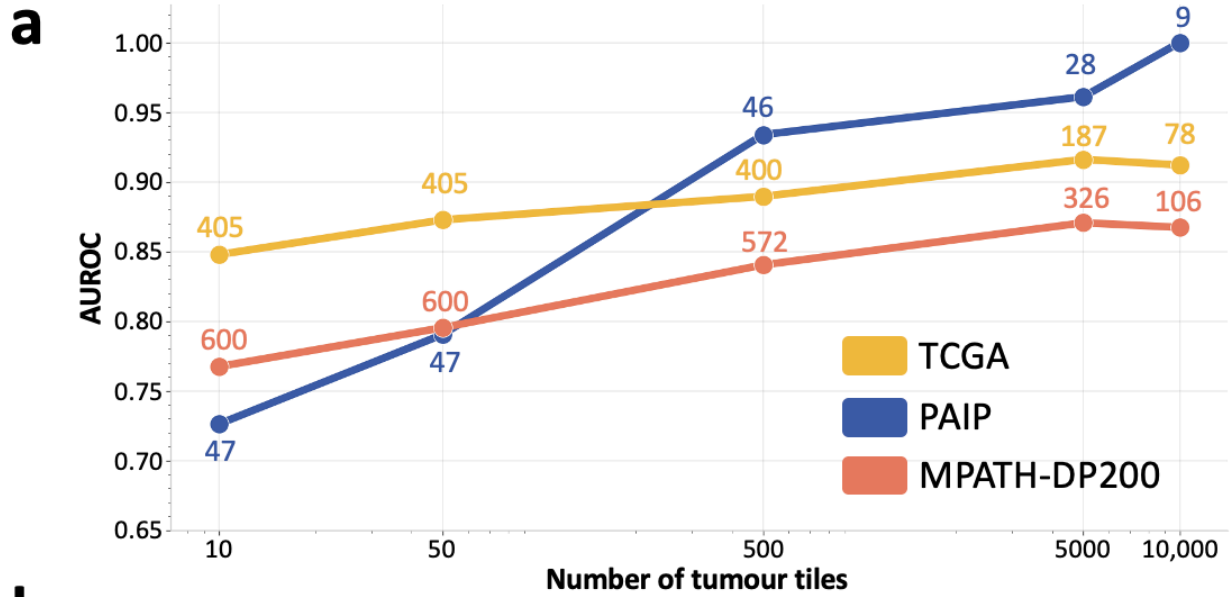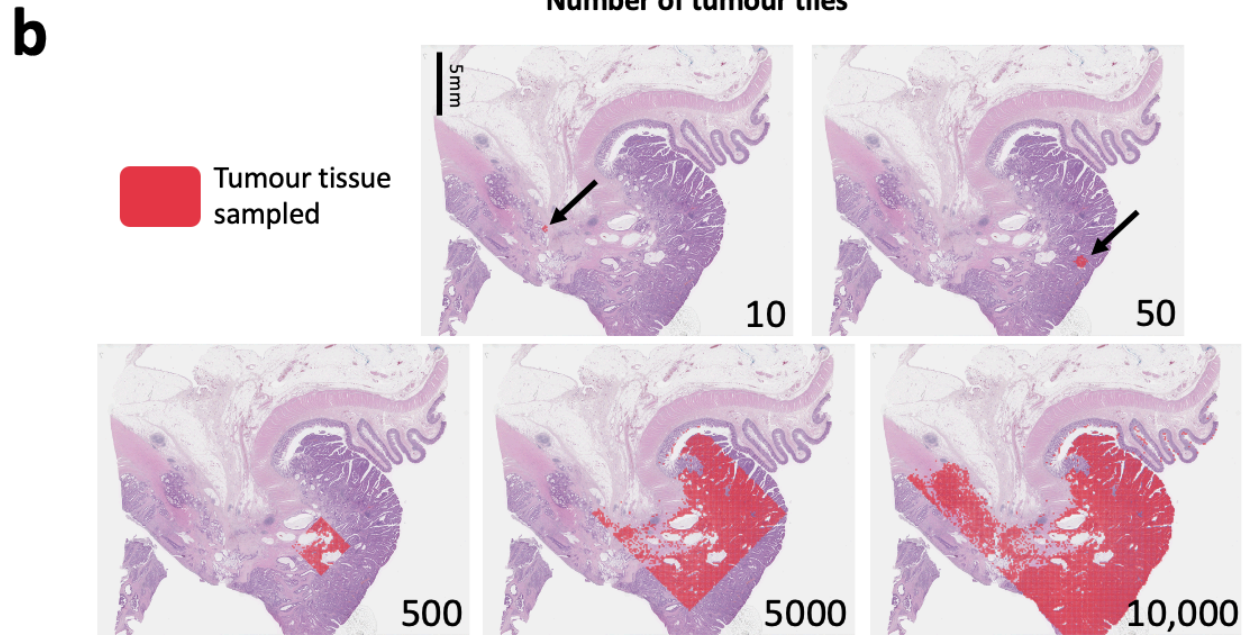

91

92 Supplementary figure 5. Impact of amount of tumour on the model.

93 To assess the minimum amount of tumour on the slide needed to ensure MSIntuit yields good

94 performance, we looked at how the number of tumour tiles impact the results obtained on TCGA

95 and PAIP cohorts before performing the blind-validation. a) For a number  $x$  being 10, 50, 500,

96 5000, 10000, we randomly selected an area of  $x$  tumour tiles for each slide and performed the

97 prediction on it. Slides with less than  $x$  tumour tiles were discarded. Number of slides that contain

98 at least  $x$  tumour tiles are displayed next to each point. X-axis is in log scale, b) Example of tumour

99 areas selected, for different numbers of tumour tiles (bottom right corner of each image).

100

101

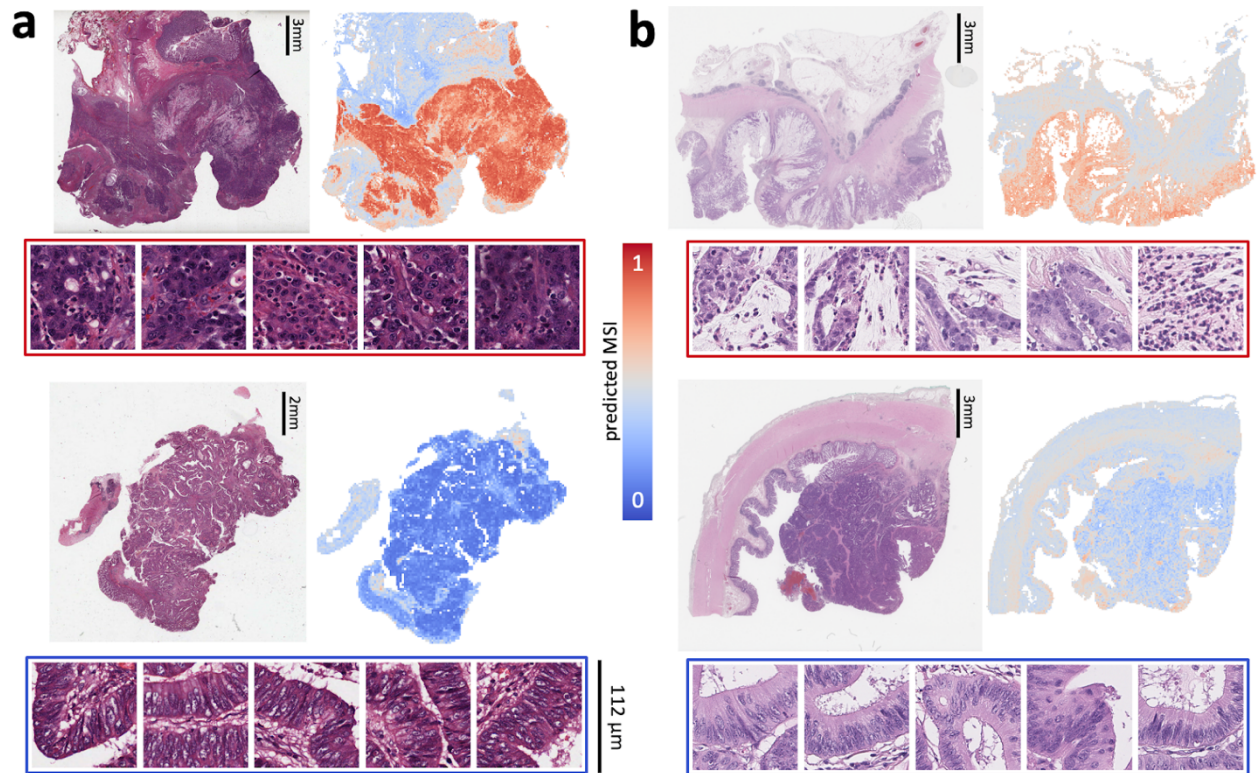

102

103 Supplementary figure 6. Model's interpretability on TCGA & PAIP cohorts.

104 Heatmaps of the tool with corresponding most predictive tiles of a representative MSI case (top)  
 105 and a pMMR/MSS case (bottom) of a) TCGA cohort, b) PAIP cohort.

106

## 107 Supplementary tables

108 Supplementary table 1: Performance comparison of MSIntuit against several other pre-  
 109 training approaches.

110 We compared the SSL-base pre-training of our feature extractor against two different pre-  
 111 trainings: ImageNet pre-training and NCT-CRC-100K pre-training. The first one consists of using  
 112 a feature extractor pre-trained on ImageNet dataset in a supervised fashion. The second one  
 113 consists of using a feature extractor pre-trained in a supervised fashion on NCT-CRC-100K, a  
 114 dataset of 100,000 colorectal cancer images, to predict nine tissue classes.<sup>§</sup> Apart from the feature  
 115 extraction, the same pipeline was used for all methods (QC, downstream model etc ..). In order to  
 116 provide a fair comparison against MSIntuit, we benchmarked both the last block and penultimate  
 117 block of the architecture, as the higher layer neurons of such networks are known to be too  
 118 specialised for their original task.<sup>z</sup> AUROCs obtained on TCGA (cross-validation), PAIP, MPATH-  
 119 DP200 and MPATH-UFS cohorts are reported in the table below.

120

| Pre-training dataset | Method                     | Block       | TCGA         | PAIP             | MPATH-DP200      | MPATH-UFS        |
|----------------------|----------------------------|-------------|--------------|------------------|------------------|------------------|
| ImageNet             | Supervised                 | Penultimate | 0.80 +- 0.05 | 0.92 [0.84-0.97] | 0.79 [0.74-0.83] | 0.78 [0.73-0.83] |
|                      |                            | Last        | 0.81 +- 0.04 | 0.88 [0.73-0.98] | 0.78 [0.73-0.82] | 0.73 [0.67-0.77] |
| NCT-CRC-100K         | Supervised                 | Penultimate | 0.79 +- 0.06 | 0.81 [0.67-0.92] | 0.79 [0.75-0.83] | 0.68 [0.62-0.73] |
|                      |                            | Last        | 0.77 +- 0.04 | 0.72 [0.56-0.86] | 0.71 [0.66-0.76] | 0.61 [0.56-0.67] |
| TCGA                 | Self-supervised (MSIntuit) | Last        | 0.93 +- 0.03 | 0.96 [0.90-0.99] | 0.88 [0.84-0.91] | 0.87 [0.83-0.90] |

121

122 Supplementary table 2: Performance comparison of MSIntuit against iDaRS.

123 We compared the performance of MSIntuit against a ResNet34 from TIAToolbox library, trained  
 124 on colorectal cancer slides from TCGA using iDaRS methodology. <sup>8,9</sup> Performances of these  
 125 models are reported in the table below on three external datasets (PAIP, MPATH-DP200 and  
 126 MPATH-UFS).

127

|                    | PAIP             | MPATH-DP200      | MPATH-UFS        |
|--------------------|------------------|------------------|------------------|
| iDARS (TIAToolbox) | 0.86 [0.75-0.94] | 0.80 [0.76-0.85] | 0.76 [0.71-0.81] |
| MSIntuit           | 0.96 [0.90-0.99] | 0.88 [0.84-0.91] | 0.87 [0.83-0.90] |

128

129 Supplementary table 3: Training the model on FFPE slides only versus FFPE and frozen  
 130 slides of TCGA-COAD.

131 Both FFPE and snap-frozen slides are available for most patients of the TCGA-COAD dataset,  
 132 the dataset we used for training. Although MSIntuit is intended to be used on FFPE slides, we  
 133 found that using frozen slides in addition to FFPE ones during Chowder training slightly improved  
 134 performance when validating the tool on FFPE samples, likely because the Chowder model gained  
 135 robustness with this augmentation strategy all the while doubling our sample size. In the table  
 136 below, we compared the performance of two models : one model trained using only FFPE slides,  
 137 and another model which uses both FFPE and frozen slides for training (MSIntuit). In the table  
 138 below, we display the results obtained when validating on FFPE slides of TCGA-COAD (cross-  
 139 validation), PAIP and MPATH-DP200 datasets (external validation).

140

| Cohort | Metric | FFPE Only | FFPE & Frozen (MSIntuit) |
|--------|--------|-----------|--------------------------|
|--------|--------|-----------|--------------------------|



|             |             |                  |                  |
|-------------|-------------|------------------|------------------|
| TCGA-COAD   | AUROC       | 0.91 +- 0.02     | 0.93 +- 0.03     |
| PAIP        | AUROC       | 0.97 [0.90-0.99] | 0.97 [0.90-0.99] |
| MPATH-DP200 | AUROC       | 0.88 [0.84-0.90] | 0.88 [0.84-0.91] |
|             | Sensitivity | 0.94 [0.90-0.98] | 0.98 [0.95-1.00] |
|             | Specificity | 0.57 [0.53-0.60] | 0.46 [0.42-0.50] |
| MPATH-UFS   | AUROC       | 0.86 [0.82-0.89] | 0.87 [0.83-0.90] |
|             | Sensitivity | 0.96 [0.92-0.99] | 0.96 [0.91-0.99] |
|             | Specificity | 0.42 [0.38-0.46] | 0.47 [0.43-0.51] |

141

142 Supplementary table 4: Training/Testing on tumour regions only.

143 Even though known MSI-related features are found only within tumour regions, we found that  
 144 applying our model on the whole slide yielded slightly better results. In the table below, we  
 145 compare the performance of two models : one model trained and validated using only tumour  
 146 regions of the slide, and MSIntuit which keeps the whole slide for training and validation. tumour  
 147 regions were defined using a tumour detection model (see section Quality Checks of Material and  
 148 Methods).

149

| Cohort      | Metric      | Tumour Only      | Whole slide (MSIntuit) |
|-------------|-------------|------------------|------------------------|
| TCGA-COAD   | AUROC       | 0.90 +- 0.03     | 0.93 +- 0.03           |
| PAIP        | AUROC       | 0.94 [0.85-0.99] | 0.97 [0.90-0.99]       |
| MPATH-DP200 | AUROC       | 0.88 [0.85-0.91] | 0.88 [0.84-0.91]       |
|             | Sensitivity | 0.96 [0.91-0.99] | 0.98 [0.95-1.00]       |
|             | Specificity | 0.45 [0.41-0.48] | 0.46 [0.42-0.50]       |

150

151 Supplementary table 5: Performance to detect unusual isolated losses of PMS2 and  
 152 MSH6.

153 We assessed the ability of MSIntuit to detect unusual isolated losses of PMS2 and MSH6 on  
 154 MPATH-DP200 and MPATH-UFS cohorts. Sensitivity for each protein loss is given in the table  
 155 below.  
 156

| Loss | # MPATH-DP200 cases with isolated loss | # MPATH-UFS cases with isolated loss | Sensitivity on MPATH-DP200 | Sensitivity on MPATH-UFS |
|------|----------------------------------------|--------------------------------------|----------------------------|--------------------------|
| PMS2 | 10                                     | 10                                   | 0.91 [0.7-1.0]             | 0.91 [0.85-0.95]         |
| MSH6 | 3                                      | 5                                    | 0.67 [0.0-1.0]             | 0.72 [0.54-0.86]         |

157

158 Supplementary table 6: Ablation study of QC step on MPATH-DP200.

159 We conducted an ablation study on the MPATH-DP200 cohort of the two QC steps (tumour check  
 160 and blurry check). Ablation of tumour check: we kept slides with too few tumour instead of  
 161 discarding them. This means that 28 slides with small tumour areas were added to the validation  
 162 cohort. Ablation of blurry check: we kept the slides with large blurry areas (n=13), instead of using  
 163 the rescanned version. Model performance with these experiments can be found below.  
 164

|                                        | n   | AUC              | Sensitivity      | Specificity      | NPV             |
|----------------------------------------|-----|------------------|------------------|------------------|-----------------|
| QC (tumour and blurry check, baseline) | 537 | 0.88 [0.84-0.91] | 0.98 [0.95-1.0]  | 0.46 [0.42-0.50] | 0.99 [0.98-1.0] |
| No tumour check                        | 565 | 0.86 [0.82-0.89] | 0.96 [0.91-0.99] | 0.45 [0.42-0.49] | 0.98 [0.97-1.0] |
| No blurry check                        | 537 | 0.88 [0.85-0.91] | 0.98 [0.95-1.0]  | 0.46 [0.42-0.50] | 0.99 [0.98-1.0] |

165

166 Supplementary table 7: Univariate analysis of MSPath features on MPATH-DP200.

167 Distribution of MSPath features for a subset of 202 cases of MSPath DP200 cohort (MSI: n=39,  
 168 19%), stratifying by MSI status. Sensitivity and specificity are given for each feature, as well as  
 169 the distribution of MSIntuit prediction for each subgroup.  
 170

| Feature          | Subgroup    | MSI (row %) | non-MSI (row %) | Sensitivity (95% CI) | Specificity (95% CI) | Median MSIntuit prediction (95% CI) |
|------------------|-------------|-------------|-----------------|----------------------|----------------------|-------------------------------------|
| Age at diagnosis | < 50        | 0           | 11 (100)        | 0 (0-0)              | 93 (90-96)           | 0.33 (0.15-0.61)                    |
|                  | >= 50       | 39 (20)     | 152 (80)        |                      |                      | 0.25 (0.11-0.79)                    |
| Anatomical site  | Right-sided | 35 (29)     | 85 (71)         | 90 (81-97)           | 48 (42-54)           | 0.32 (0.11-0.82)                    |
|                  | Left-sided  | 4 (5)       | 78 (95)         |                      |                      | 0.21 (0.12-0.53)                    |

|                                 |                       |         |          |               |               |                  |
|---------------------------------|-----------------------|---------|----------|---------------|---------------|------------------|
| Histological Type               | Mucinous or other     | 3 (30)  | 7 (70)   | 8<br>(2-16)   | 96<br>(93-98) | 0.58 (0.34-0.84) |
|                                 | Adenocarcinoma        | 36 (19) | 156 (81) |               |               | 0.24 (0.11-0.76) |
| Grade                           | Poorly differentiated | 10 (71) | 4 (29)   | 26<br>(14-38) | 98<br>(95-99) | 0.77 (0.51-0.85) |
|                                 | Other                 | 29 (15) | 159 (85) |               |               | 0.24 (0.11-0.72) |
| Crohn-like reaction             | Yes                   | 13 (24) | 42 (76)  | 33<br>(21-46) | 74<br>(69-80) | 0.24 (0.12-0.80) |
|                                 | No                    | 26 (18) | 121 (82) |               |               | 0.26 (0.11-0.78) |
| Tumour infiltrating lymphocytes | Yes                   | 15 (33) | 30 (67)  | 38<br>(26-50) | 82<br>(76-87) | 0.29 (0.14-0.81) |
|                                 | No                    | 24 (15) | 133 (85) |               |               | 0.24 (0.11-0.76) |

171

172 Supplementary table 8: Logistic regression model combining MSPath and MSIntuit  
 173 classification scores.

174 We trained a logistic regression to predict the MSI status taking as input the MSPath and MSIntuit  
 175 binary classification outputs on a subset of cases (n=202) from MPATH-DP200. For each variable,  
 176 we give the coefficients, standard error, z-value, p-value and 95% confidence interval bounds.  
 177

| Variable  | coef    | Std err | z      | p     | 0.025  | 0.975  |
|-----------|---------|---------|--------|-------|--------|--------|
| Intercept | -6.9986 | 1.425   | -4.910 | 0.000 | -9.792 | -4.205 |
| MSPath    | 3.2081  | 1.035   | 3.100  | 0.002 | 1.180  | 5.236  |
| MSIntuit  | 3.4138  | 1.032   | 3.307  | 0.001 | 1.390  | 5.437  |

178 Supplementary table 9: Confusion matrix of MSIntuit classification vs MSPath  
 179 classification.

180 Below, one can find the assignments of MSPath and MSIntuit on a subset of 202 cases from  
 181 MPATH-DP200 cohort, stratifying by MSI status (ground truth). Interestingly, 18% (respectively  
 182 22%) of the population were misclassified by MSPath (respectively MSIntuit) but correctly  
 183 classified by MSIntuit (respectively MSPath). A simple dichotomic classifier  $F(\text{MSPath classification, MSIntuit classification}) = 0$  if (MSPath or MSIntuit classification is 0) else 1 yielded  
 184 a Sensitivity of 0.95 and a Specificity of 0.67.  
 185  
 186

|        |              | MSI Status |     |
|--------|--------------|------------|-----|
| MSPath | MSIntuit     | non-MSI    | MSI |
| 0      | MSS-AI       | 31         | 0   |
|        | Undetermined | 35         | 1   |
| 1      | MSS-AI       | 43         | 1   |
|        | Undetermined | 54         | 37  |

187

188 Supplementary table 10: Cohorts description.

|                                  | TCGA          | PAIP        | Medipath<br>(MPATH-DP200 / MPATH-UFS)                       |
|----------------------------------|---------------|-------------|-------------------------------------------------------------|
| Number of patients               | 434           | 47          | 600                                                         |
| Region                           | United States | South Korea | France                                                      |
| H&E FFPE slides, n               | 427           | 47          | 600                                                         |
| H&E Frozen slides, n             | 432           | -           | -                                                           |
| MSI patients, n (%)              | 78 (18)       | 12 (26)     | 123 (21)                                                    |
| dMMR/MSI diagnosis               | MSI-PCR       | MSI-PCR     | MMR-IHC 4-plex, followed by MSI-PCR for indeterminate cases |
| Scanner                          | Aperio        | Aperio AT2  | Ventana DP200 & Phillips Ultra Fast Intellisite             |
| Age at diagnosis, IQR            | 68 (58-77)    | -           | 74 (64-82)                                                  |
| Well differentiated, n (%)       | -             | -           | 219 (39)                                                    |
| Moderately differentiated, n (%) | -             | -           | 296 (53)                                                    |
| Poorly differentiated, n (%)     | -             | -           | 46 (8)                                                      |
| Stage 0, n (%)                   | 1 (1)         | -           | 11 (2)                                                      |
| Stage I, n (%)                   | 67 (18)       | -           | 114 (20)                                                    |
| Stage II, n (%)                  | 146 (38)      | -           | 217 (37)                                                    |
| Stage III, n (%)                 | 113 (29)      | -           | 219 (38)                                                    |
| Stage IV, n (%)                  | 56 (14)       | -           | 18 (3)                                                      |

189

190 Supplementary table 11: Performance of MSIntuit repeating threshold decision  
191 procedure.

192 Since the calibration step involves selecting some slides to define an appropriate operating  
193 threshold, we analysed how the selection of these slides may impact the model performance. To  
194 this end, we repeated the calibration step 1000 times (selecting each time a different set of slides  
195 to calibrate the tool, and assessing the performance of the model on the remaining patients).  
196 Metrics obtained with this experiment are reported in the table below.

197

|             | MPATH-DP200      | MPATH-UFS        |
|-------------|------------------|------------------|
| AUROC       | 0.88 [0.87-0.89] | 0.87 [0.85-0.88] |
| Sensitivity | 0.95 [0.82-1.0]  | 0.95 [0.84-1.0]  |
| Specificity | 0.52 [0.16-0.82] | 0.47 [0.14-0.72] |

198

199 Supplementary table 12: Intraclass Correlation Coefficient (ICC).

200 *F*: value of the F-test, *df*: degrees of freedom, p-value: two-sided F-test p-value. We analysed  
201 inter-scanner reliability by computing the ICC scores. An F-test is performed in order to confirm or  
202 not the presence of bias during ICC computation. It is computed as the ratio of the mean square  
203 error between measurements over the total mean squared error. The degrees of freedom are an  
204 indication of the total number of subjects used in the analysis. As suggested by Liljequist et al., an  
205 F-value considerably smaller than the total sample size indicates that biases are weak. <sup>1</sup>

206

| MSI Status | ICC  | CI 95% ICC   | F       | df1 | df2 | p-value  |
|------------|------|--------------|---------|-----|-----|----------|
| MSI        | 0.98 | [0.97, 0.99] | 51.287  | 85  | 85  | 2.37e-44 |
| Non-MSI    | 0.99 | [0.99, 0.99] | 91.096  | 453 | 453 | 3.86e-41 |
| Both       | 0.99 | [0.99, 0.99] | 110.852 | 539 | 539 | 1.46e-90 |

207

## 208 Supplementary references

- 209 1. Liljequist, D., Elfving, B. & Skavberg Roaldsen, K. Intraclass correlation - A discussion and  
210 demonstration of basic features. *PLoS One* **14**, e0219854 (2019).
- 211 2. Koo, T. K. & Li, M. Y. A Guideline of Selecting and Reporting Intraclass Correlation  
212 Coefficients for Reliability Research. *J. Chiropr. Med.* **15**, 155–163 (2016).

- 213 3. McHugh, M. L. Interrater reliability: the kappa statistic. *Biochem. Med.* **22**, 276–282 (2012).
- 214 4. Shamonin, D. P. *et al.* Fast parallel image registration on CPU and GPU for diagnostic  
215 classification of Alzheimer’s disease. *Front. Neuroinform.* **7**, 50 (2013).
- 216 5. Klein, S., Staring, M., Murphy, K., Viergever, M. A. & Pluim, J. P. W. elastix: a toolbox for  
217 intensity-based medical image registration. *IEEE Trans. Med. Imaging* **29**, 196–205 (2010).
- 218 6. Kather, J. N., Halama, N. & Marx, A. *100,000 histological images of human colorectal*  
219 *cancer and healthy tissue.* (2018). doi:10.5281/zenodo.1214456.
- 220 7. Yosinski, J., Clune, J., Bengio, Y. & Lipson, H. How transferable are features in deep neural  
221 networks? *arXiv [cs.LG]* (2014).
- 222 8. Pocock, J. *et al.* TIAToolbox as an end-to-end library for advanced tissue image analytics.  
223 *Commun. Med.* **2**, 120 (2022).
- 224 9. Bilal, M. *et al.* Development and validation of a weakly supervised deep learning framework  
225 to predict the status of molecular pathways and key mutations in colorectal cancer from  
226 routine histology images: a retrospective study. *Lancet Digit Health* **3**, e763–e772 (2021).
